# Supplementary material for: Narcissus Plants: A Melting Pot of Potyviruses
Source: MDPI journal article supplement (doi:10.3390/v14030582), 2022-03-11
Supplement: s1 [file s1]

Supplementary Materials

## ***Narcissus* Plants: A Melting Pot of Potyviruses**

**Wiwit Probowati <sup>1,2</sup>, Shusuke Kawakubo <sup>1</sup> and Kazusato Ohshima <sup>1,2,\*</sup>**

<sup>1</sup> Laboratory of Plant Virology, Department of Biological Resource Science, Faculty of Agriculture, Saga University, 1-banchi, Honjo-machi, Saga, Saga 840-8502, Japan

<sup>2</sup> The United Graduate School of Agricultural Sciences, Kagoshima University, 1-21-24 Korimoto, Kagoshima, Kagoshima 890-0065, Japan

\* Corresponding author; ohshimak@cc.saga-u.ac.jp

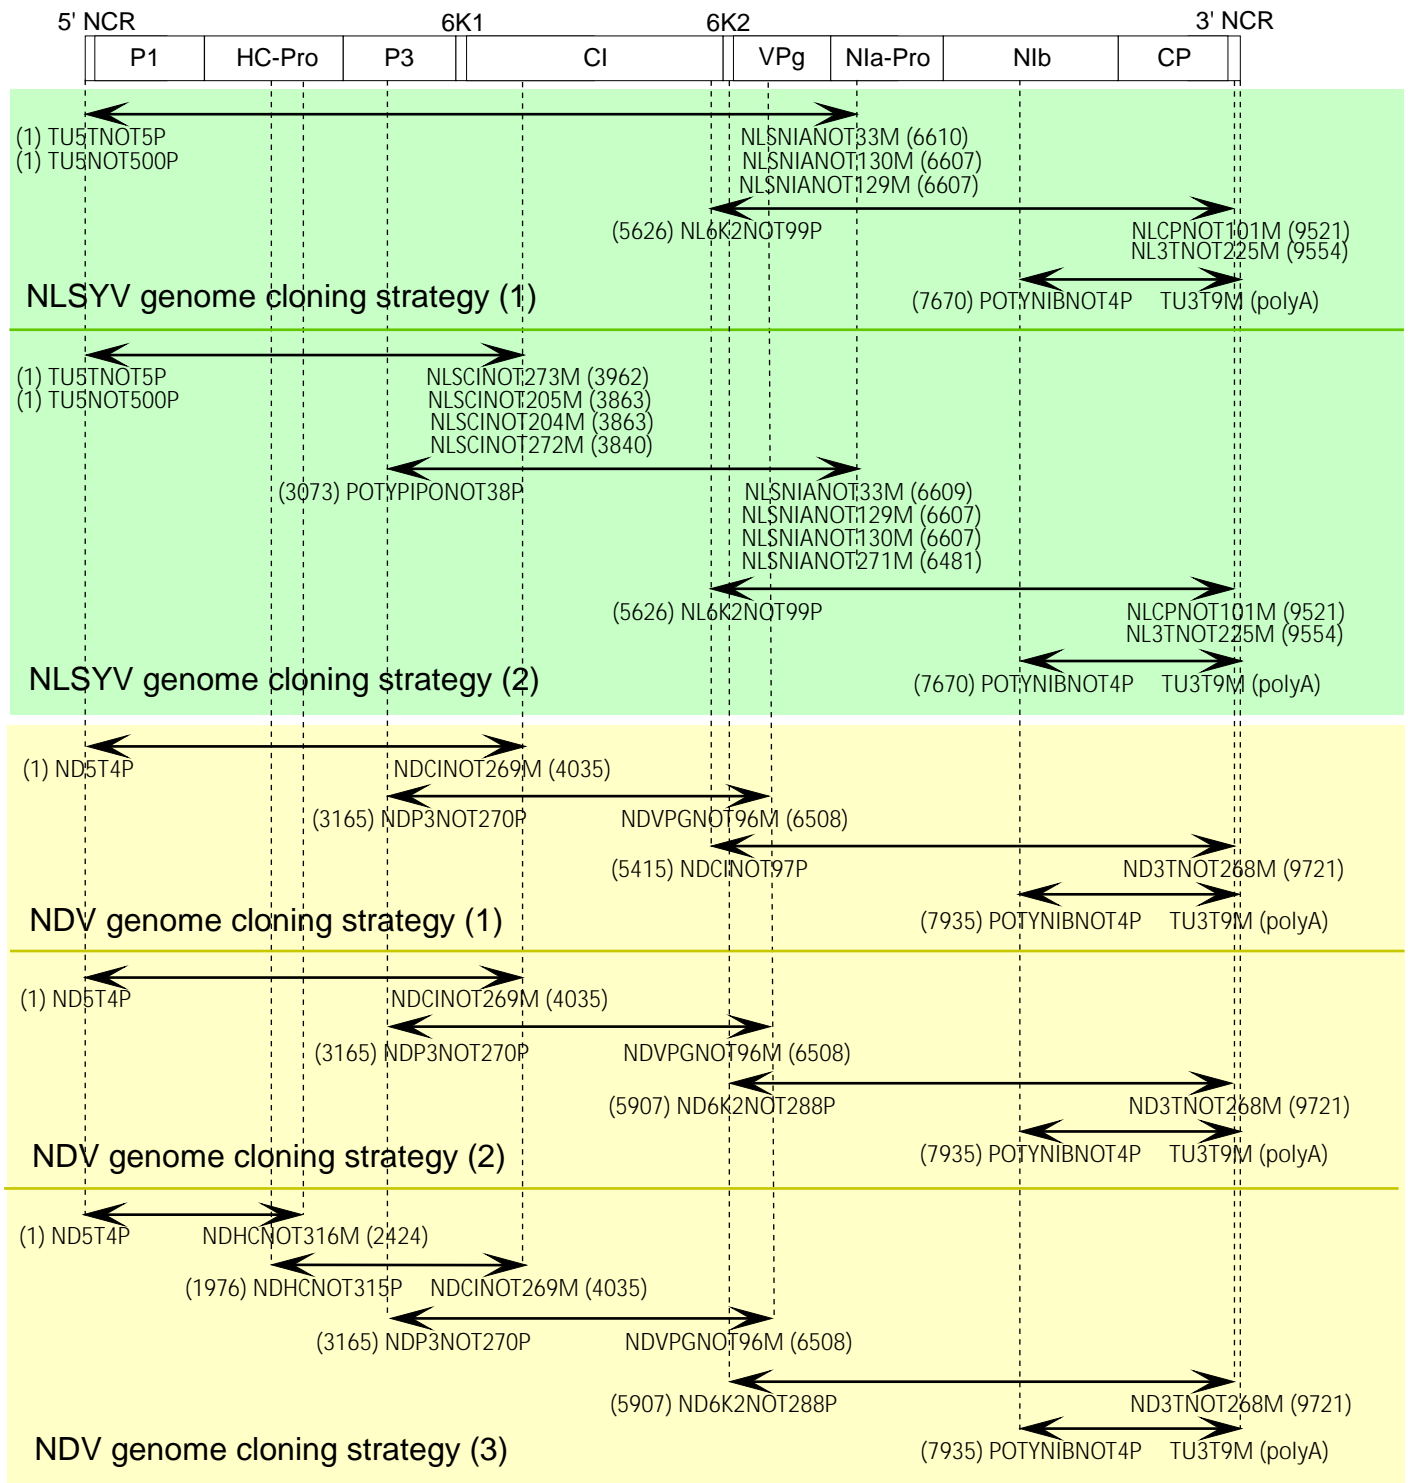

**Figure S1.** Workflow for full genomic sequencing of narcissus late season yellows virus (NLSYV) and narcissus degeneration virus (NDV). Black lines with arrow heads show the amplified regions by RT-PCR for cloning for all isolates. Numbers in parenthesis correspond to the genomic positions of Zhangzhou isolates of narcissus late season yellows virus [26] and narcissus degeneration virus [24]. NCR; non-coding region, P1; first protein, HC-Pro; helper-component proteinase protein, P3; third protein, 6K1; first 6kDa protein, CI; cylindrical inclusion protein, 6K2; second 6kDa protein, VPg; genome-linked viral protein, NIa-Pro; nuclear inclusion a proteinase protein, NIb; nuclear inclusion b protein, and CP; coat protein.

**A. nt 1 (5' end) -1800**

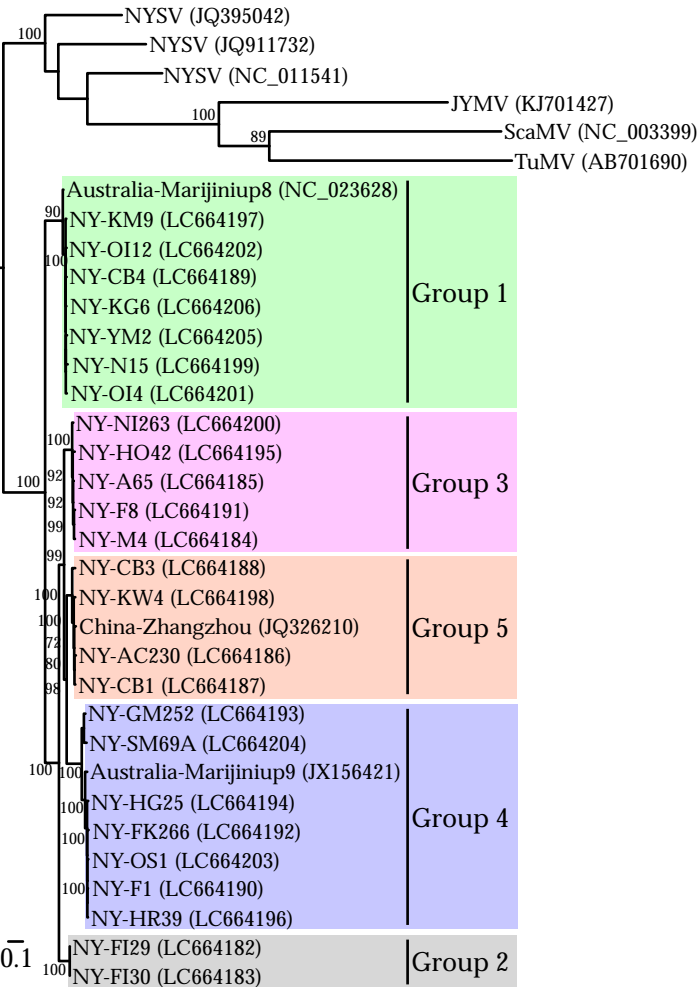

**B. nt 2200-7400**

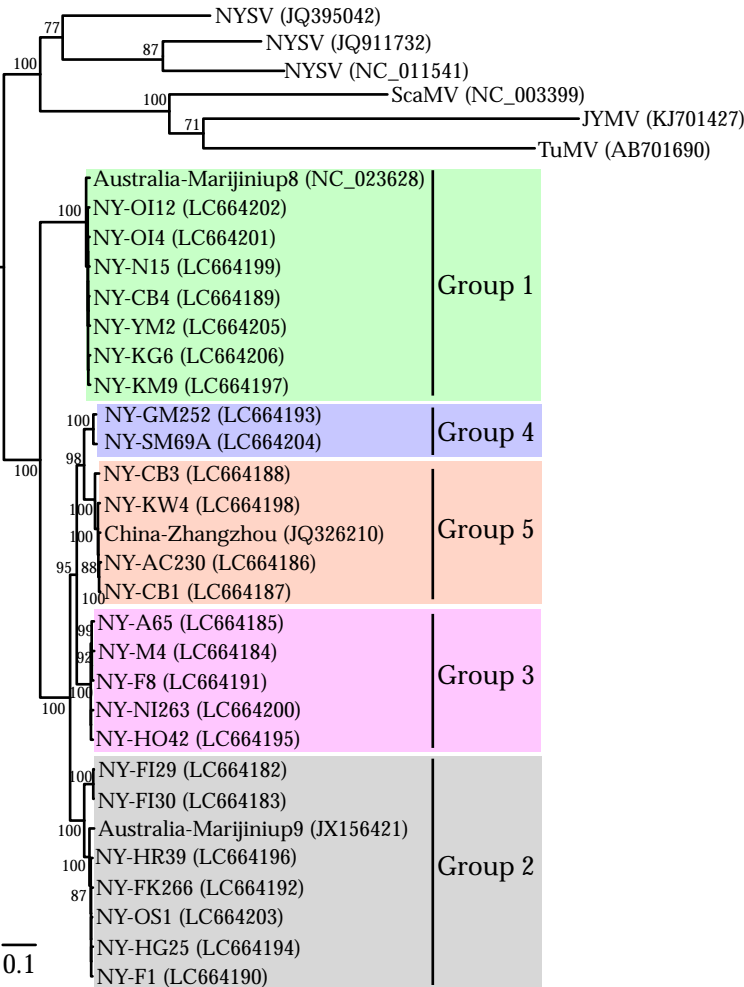

**C. nt 7700-9651 (3' end)**

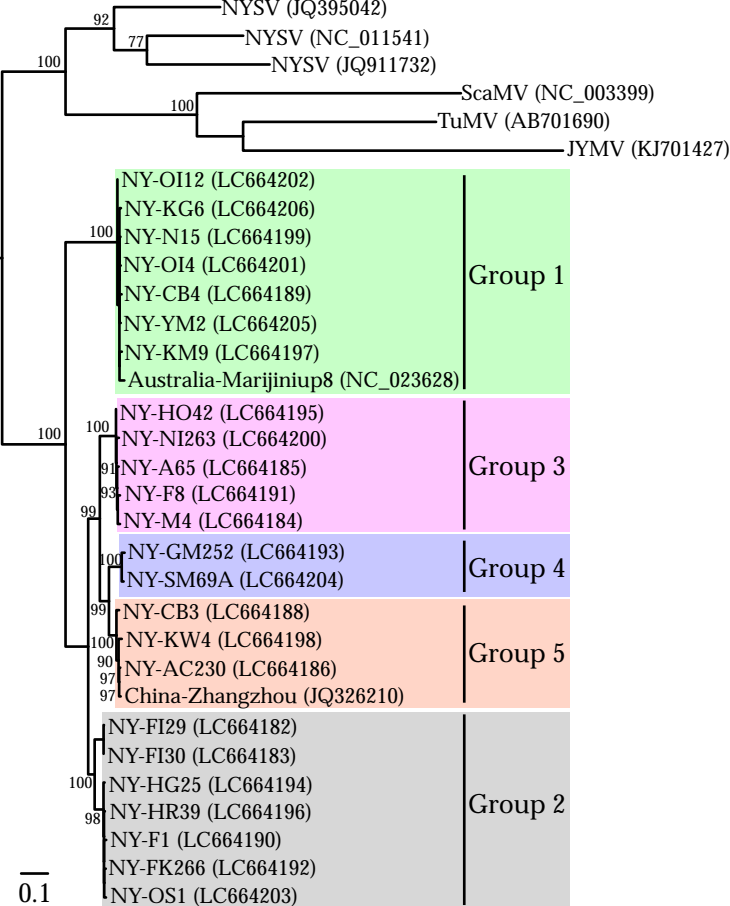

**D. nt 8617-9438 (coat protein)**

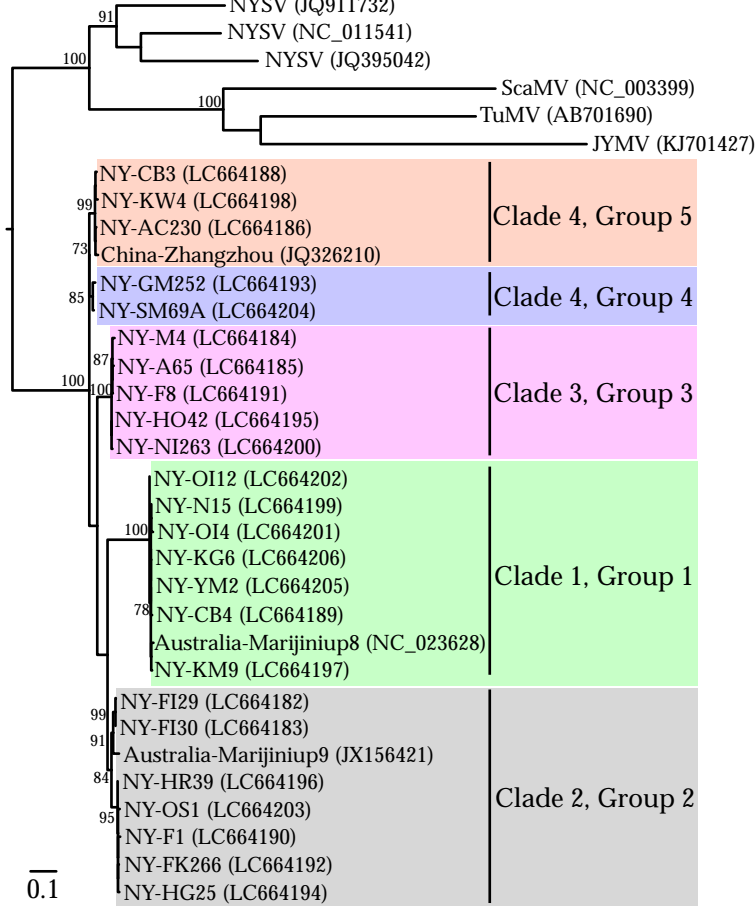

### E. nt 1-9651 (full genome)

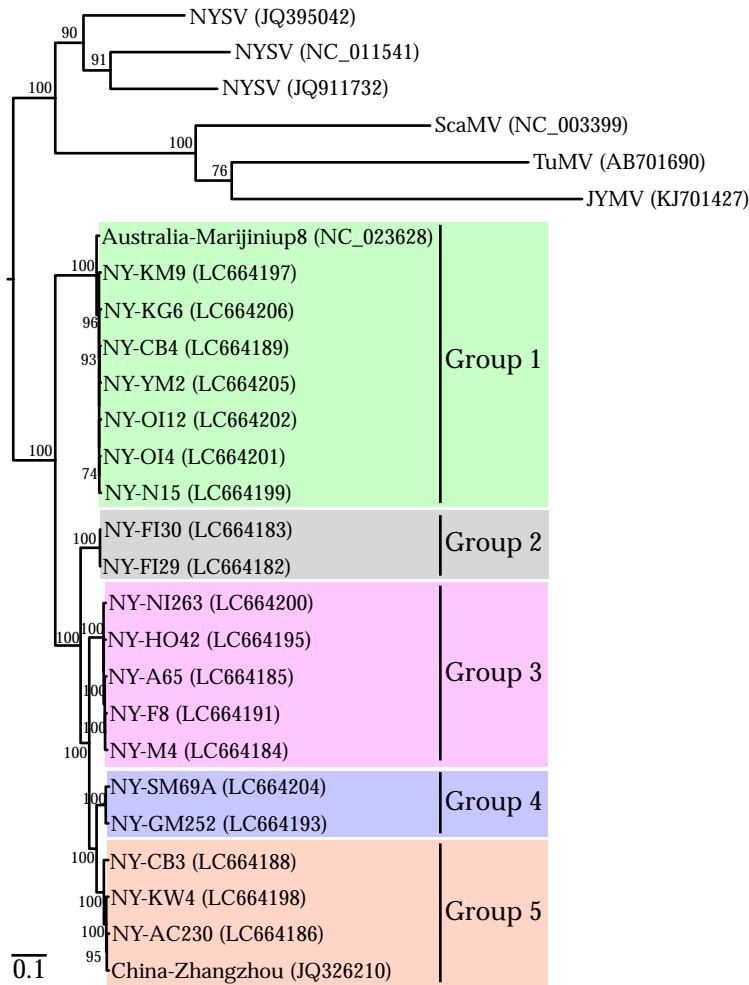

### F. nt 124-9441 (polyprotein)

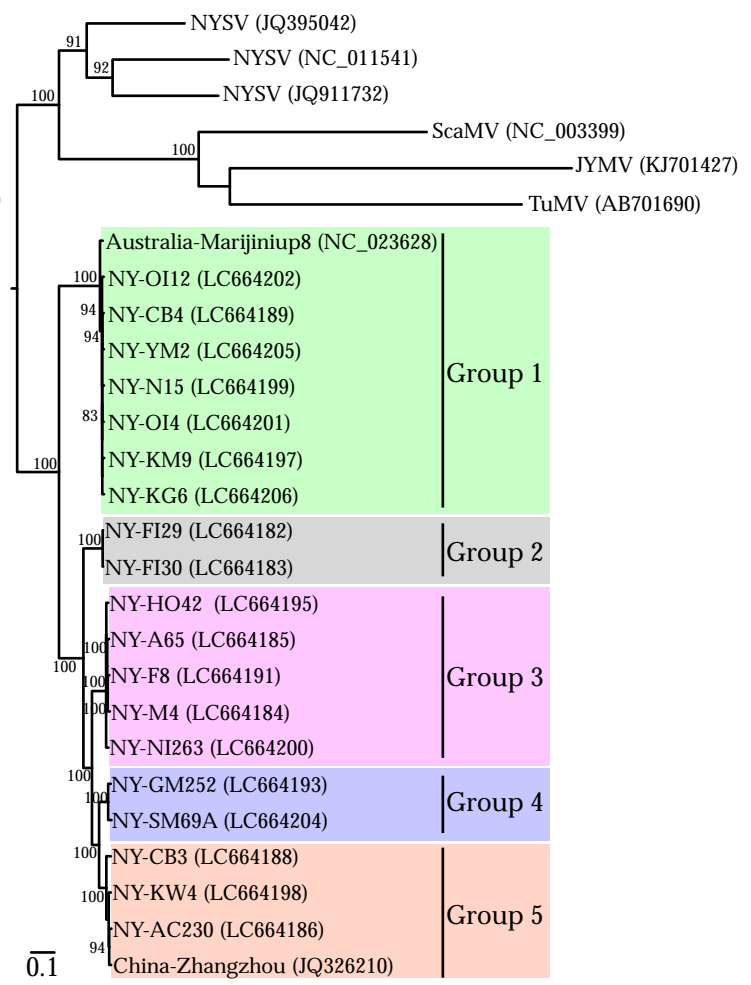

**Figure S2.** Maximum likelihood phylogenetic trees inferred using full and partial genomic sequences of narcissus late season yellows virus (NLSYV). A. nt 1-1800 region, B. nt 2200-7400 region, C. nt 7700-9651 region (excluding NY-CB1 and Marijiniup9 recombinants), D. nt 8617-9438 region (coat protein coding region, excluding NY-CB1 recombinant), E. nt 1-9651 region (full genomic region, excluding Australia-Marijiniup9, NY-F1, NY-FK226, NY-HG25, NY-HR39, NY-OS1 and NY-CB1 recombinants), and F. nt 124-9441 region (polyprotein coding region, excluding Australia-Marijiniup9, NY-F1, NY-FK226, NY-HG25, NY-HR39, NY-OS1, and NY-CB1 recombinants). The corresponding sequences of Japanese yam mosaic virus (JYMV) [46], narcissus yellow stripe virus (NYSV) [23,26,27], scallion mosaic virus (ScaMV) [48], and turnip mosaic virus (TuMV) [47] in the TuMV phylogenetic group were used as outgroup taxa. Numbers at each node indicate bootstrap percentages based on 1000 pseudoreplicates for all trees and the values >70% are only shown.

**Table S1. Collection sites and the results of genetic diagnosis of narcissus plants in this study.**

| Plant (Isolate) <sup>1</sup> | Location (town, city, prefecture)             | Collection date | Host                                           | Symptom               | Number of clones partially sequenced <sup>2</sup> (number of clones fully sequenced <sup>3</sup> ) |     |                    |      |       |      |     |
|------------------------------|-----------------------------------------------|-----------------|------------------------------------------------|-----------------------|----------------------------------------------------------------------------------------------------|-----|--------------------|------|-------|------|-----|
|                              |                                               |                 |                                                |                       | Total                                                                                              | NDV | NLSYV <sup>2</sup> | NYSV | CyEVA | OrMV | NLV |
| Hokkaido district (island)   |                                               |                 |                                                |                       |                                                                                                    |     |                    |      |       |      |     |
| NY-HO1                       | Soen, Chuo-ku, Sapporo                        | 20 June 2012    | <i>Narcissus tazetta</i> var. <i>chinensis</i> | Stripe                | 7                                                                                                  |     | 7 (3)              |      |       |      |     |
| NY-HO2                       | Soen, Chuo-ku, Sapporo                        | 20 June 2012    | <i>N. tazetta</i> var. <i>chinensis</i>        | Stripe                | ND <sup>4</sup>                                                                                    |     |                    |      |       |      |     |
| NY-HO3                       | Tonden, Kita-ku, Sapporo                      | 21 June 2012    | <i>N. tazetta</i> var. <i>chinensis</i>        | Stripe                | ND                                                                                                 |     |                    |      |       |      |     |
| NY-HO4                       | Tonden, Kita-ku, Sapporo                      | 21 June 2012    | <i>N. tazetta</i> var. <i>chinensis</i>        | Stripe                | ND                                                                                                 |     |                    |      |       |      |     |
| NY-HO5                       | Tonden, Kita-ku, Sapporo                      | 24 June 2012    | <i>N. tazetta</i> var. <i>chinensis</i>        | Stripe                | ND                                                                                                 |     |                    |      |       |      |     |
| NY-HO42                      | Nango, Shiroishi-ku, Sapporo                  | 1 June 2013     | <i>N. tazetta</i> var. <i>chinensis</i>        | Stripe                | 9                                                                                                  |     | 9 (3)              |      |       |      |     |
| NY-HO43                      | Nango, Shiroishi-ku, Sapporo                  | 1 June 2013     | <i>N. tazetta</i> var. <i>chinensis</i>        | Mild stripe           | 8                                                                                                  |     | 8 (3)              |      |       |      |     |
| NY-HO44                      | Kita 48 jo, Kita-ku, Sapporo                  | 2 June 2013     | <i>N. tazetta</i> var. <i>chinensis</i>        | Mild stripe           | 8                                                                                                  |     | 8 (3)              |      |       |      |     |
| NY-HO45                      | Fujino, Minami-ku, Sapporo                    | 2 June 2013     | <i>N. tazetta</i> var. <i>chinensis</i>        | Mild stripe           | ND                                                                                                 |     |                    |      |       |      |     |
| NY-HO46                      | Fujino, Minami-ku, Sapporo                    | 2 June 2013     | <i>N. tazetta</i> var. <i>chinensis</i>        | Mild stripe           | ND                                                                                                 |     |                    |      |       |      |     |
| NY-HO47                      | Kitanosawa, Minami-ku, Sapporo                | 2 June 2013     | <i>N. tazetta</i> var. <i>chinensis</i>        | Mild stripe           | ND                                                                                                 |     |                    |      |       |      |     |
| NY-HO48                      | Maeda, Teine-ku, Sapporo                      | 2 June 2013     | <i>N. tazetta</i> var. <i>chinensis</i>        | Symptomless           | 8                                                                                                  |     |                    |      | 8     |      |     |
| NY-HO49                      | Tonden, Kita-ku, Sapporo                      | 3 June 2013     | <i>Narcissus bulbocodium</i>                   | Symptomless           | ND                                                                                                 |     |                    |      |       |      |     |
| NY-HO50                      | Tonden, Kita-ku, Sapporo                      | 3 June 2013     | <i>N. tazetta</i> var. <i>chinensis</i>        | Mild stripe           | ND                                                                                                 |     |                    |      |       |      |     |
| NY-HO51                      | Tonden, Kita-ku, Sapporo                      | 3 June 2013     | <i>N. tazetta</i> var. <i>chinensis</i>        | Mild stripe           | ND                                                                                                 |     |                    |      |       |      |     |
| NY-HO52                      | Tonden, Kita-ku, Sapporo                      | 3 June 2013     | <i>N. tazetta</i> var. <i>chinensis</i>        | Mild stripe           | 10                                                                                                 |     | 10 (3)             |      |       |      |     |
| NY-HO54                      | Minamiosato, Kitahirosima                     | 3 June 2013     | <i>N. tazetta</i> var. <i>chinensis</i>        | Mild stripe           | ND                                                                                                 |     |                    |      |       |      |     |
| NY-HO55                      | Higashikyoei, Kitahirosima                    | 3 June 2013     | <i>N. tazetta</i> var. <i>chinensis</i>        | Mild stripe           | ND                                                                                                 |     |                    |      |       |      |     |
| NY-HO56                      | Shinano, Chitose                              | 3 June 2013     | <i>N. tazetta</i> var. <i>chinensis</i>        | Mild stripe           | ND                                                                                                 |     |                    |      |       |      |     |
| NY-HO186                     | Shinonome-cho, Chitose                        | 4 June 2014     | <i>Narcissus tazetta</i> ?                     | Severe stripe         | 9                                                                                                  |     |                    |      |       |      | 9   |
| NY-HO301                     | Maruyama, Kuriyama-cho, Yubari-gun,           | 6 May 2015      | <i>Narcissus jonquilla</i>                     | Severe mosaic, stripe | 9                                                                                                  |     |                    |      |       |      | 9   |
| NY-HO306                     | Honcho, Naname-cho, Kameda-gun                | 6 May 2015      | <i>Narcissus pseudonarcisus</i>                | Symptomless           | ND                                                                                                 |     |                    |      |       |      |     |
| NY-HO307                     | Funamicho, Toyoura-cho, Abuta-gun             | 7 May 2015      | <i>N. pseudonarcisus</i>                       | Mild stripe           | 10                                                                                                 |     | 10 (3)             |      |       |      |     |
| NY-HO308                     | Fukushima, KImobetsu-cho, Abuta-gun           | 7 May 2015      | <i>N. tazetta</i> var. <i>chinensis</i>        | Symptomless           | ND                                                                                                 |     |                    |      |       |      |     |
| Tohoku district              |                                               |                 |                                                |                       |                                                                                                    |     |                    |      |       |      |     |
| NY-A65                       | Nanbu-cho, Sannohe-gun, Aomori                | 22 January 2014 | <i>N. tazetta</i> var. <i>chinensis</i>        | Mosaic                | 10                                                                                                 |     | 10 (3)             |      |       |      |     |
| NY-A178                      | Nanbu-cho, Sannohe-gun, Aomori                | 15 May 2014     | <i>N. tazetta</i> var. <i>chinensis</i>        | Mosaic                | 11                                                                                                 |     | 11 (3)             |      |       |      |     |
| NY-IW1                       | -, Morioka, Iwate                             | 14 June 2014    | <i>N. tazetta</i> var. <i>chinensis</i>        | Symptomless           | ND                                                                                                 |     |                    |      |       |      |     |
| NY-IW2                       | -, Morioka, Iwate                             | 14 June 2014    | <i>N. tazetta</i> var. <i>chinensis</i>        | Symptomless           | ND                                                                                                 |     |                    |      |       |      |     |
| NY-IW148                     | Toyama, Shiwa-cho, Shiwa-gun, Iwate           | 14 June 2014    | <i>N. jonquilla</i>                            |                       | 10                                                                                                 |     |                    | 10   |       |      |     |
| NY-IW149                     | Toyama, Shiwa-cho, Shiwa-gun, Iwate           | 14 June 2014    | <i>N. jonquilla</i>                            | Stripe                | 10                                                                                                 |     |                    | 10   |       |      |     |
| NY-IW196                     | Koromogawa-ku, Oshu, Iwate                    | 14 June 2014    | <i>N. tazetta</i> var. <i>chinensis</i>        | Stripe                | ND                                                                                                 |     |                    |      |       |      |     |
| NY-IW203                     | Kawashiri, Nishiwaga-machi, Waga-gun, Iwate   | 14 June 2014    | <i>N. tazetta</i> var. <i>chinensis</i>        | Severe stripe         | ND                                                                                                 |     |                    |      |       |      |     |
| NY-IW204                     | Kamiezuriko, Kitakami, Iwate                  | 14 June 2014    | <i>N. tazetta</i> var. <i>chinensis</i>        | Stripe                | ND                                                                                                 |     |                    |      |       |      |     |
| NY-MY210                     | Irimada, Shibata-machi, Shibata-gun, Miyagi   | 14 June 2014    | <i>N. tazetta</i> var. <i>chinensis</i>        | Stripe                | ND                                                                                                 |     |                    |      |       |      |     |
| NY-MY211                     | Minamihase, Iwanuma, Miyagi                   | 14 June 2014    | <i>N. tazetta</i> var. <i>chinensis</i>        | Symptomless           | ND                                                                                                 |     |                    |      |       |      |     |
| NY-MY292                     | Zao-machi, Katta, Miyagi                      | 23 April 2015   | <i>N. tazetta</i> var. <i>chinensis</i>        | Symptomless           | 8                                                                                                  |     | 8 (2)              |      |       |      |     |
| NY-MY293                     | Zao-machi, Katta, Miyagi                      | 23 April 2015   | <i>N. tazetta</i> var. <i>chinensis</i>        | Mosaic, stripe        | 10                                                                                                 |     | 3 (2)              | 5    |       |      | 2   |
| NY-AK205                     | Sugisawaaratokoro, Yuzawa, Akita              | 14 June 2014    | <i>N. tazetta</i> var. <i>chinensis</i>        | Stripe                | ND                                                                                                 |     |                    |      |       |      |     |
| NY-AK285                     | Hiroomote, Hiroomote, Akita Akita             | 25 April 2015   | <i>N. tazetta</i> var. <i>chinensis</i>        | Stripe                | ND                                                                                                 |     |                    |      |       |      |     |
| NY-AK287                     | Nishinagano, Kadonodate-machi, Senboku, Akita | 25 April 2015   | <i>N. tazetta</i> var. <i>chinensis</i>        | Mild stripe           | ND                                                                                                 |     |                    |      |       |      |     |
| NY-AK288                     | Sotsuda, Kitazawako, Senboku, Akita           | 25 April 2015   | <i>N. jonquilla</i>                            | Mild stripe           | ND                                                                                                 |     |                    |      |       |      |     |
| NY-AK289                     | Kyowahunooka, Daisen, Akita                   | 25 April 2015   | <i>N. jonquilla</i>                            | Mild stripe           | ND                                                                                                 |     |                    |      |       |      |     |
| NY-YA193                     | Zaohotta, Yamagata, Yamagata                  | 15 June 2014    | <i>N. tazetta</i> var. <i>chinensis</i>        | Symptomless           | ND                                                                                                 |     |                    |      |       |      |     |
| NY-YA194                     | Hara-machi, Tendo, Yamagata                   | 15 June 2014    | <i>N. tazetta</i> var. <i>chinensis</i>        | Stripe                | ND                                                                                                 |     |                    |      |       |      |     |
| NY-YA195                     | Kubota-machi, Yonezawa, Yamagata              | 15 June 2014    | <i>N. tazetta</i> var. <i>chinensis</i>        | Stripe                | ND                                                                                                 |     |                    |      |       |      |     |
| NY-YA276                     | -, Tsuruoka, Yamagata                         | 25 April 2015   | <i>N. tazetta</i> var. <i>chinensis</i>        | Mild stripe           | ND                                                                                                 |     |                    |      |       |      |     |

<sup>1</sup> Rows in brown show that narcissus plants were co-infected with two or more viruses, whereas rows in blue show that those were singly infected with narcissus degeneration virus (NDV), narcissus late season yellows virus (NLSYV), narcissus yellow stripe virus (NYSV)-like virus, cyrtanthus elatus virus A (CyEVA), ornithogalum mosaic virus (OrMV) or narcissus latent virus (NLV).

<sup>2</sup> Number of clones sequenced for approximately 650-700 bp by POTYNIB5P primer.

<sup>3</sup> Number of clones sequenced for coat protein coding region.

<sup>4</sup> Not detected.

Table S1. Continued.

| Plant (Isolate)       | Location (town, city, prefecture)                | Collection date  | Host                                      | Symptom       | Number of clones partially sequenced <sup>2</sup> (number of clones fully sequenced <sup>3</sup> ) |        |         |      |       |      |     |
|-----------------------|--------------------------------------------------|------------------|-------------------------------------------|---------------|----------------------------------------------------------------------------------------------------|--------|---------|------|-------|------|-----|
|                       |                                                  |                  |                                           |               | Total                                                                                              | NDV    | NLSYV   | NYSV | CyEVA | OrMV | NLV |
| NY-FK266              | Motomiya, Fukushima                              | 23 April 2015    | <i>N. jonquilla</i>                       | Stripe        | 18                                                                                                 | 12     | 2 (2)   | 4    |       |      |     |
| NY-FK270              | Akogashima, Atami-machi, Koriyama, Fukushima     | 23 April 2015    | <i>N. tazetta</i> var. <i>chinensis</i>   | Symptomless   | ND                                                                                                 |        |         |      |       |      |     |
| NY-FK275              | Yamagata, Inawashiro-machi, Fukushima, Fukushima | 23 April 2015    | <i>N. jonquilla</i>                       | Mild stripe   | ND                                                                                                 |        |         |      |       |      |     |
| <b>Kanto district</b> |                                                  |                  |                                           |               |                                                                                                    |        |         |      |       |      |     |
| NY-IB71A              | -, -, Ibaraki                                    | 11 November 2013 | <i>Narcissus</i> sp. cv. Erlicheer        | Stripe        | 10                                                                                                 |        | 10 (2)  |      |       |      |     |
| NY-IB248              | Kanaya-cho, Mito, Ibaraki                        | 17 March 2015    | <i>N. tazetta</i> var. <i>chinensis</i>   | Stripe        | 9                                                                                                  |        |         |      | 9     |      |     |
| NY-TC249              | Ota, Fujioka-machi, Tochigi, Tochigi             | 17 March 2015    | <i>N. tazetta</i> var. <i>chinensis</i>   | Yellowing     | ND                                                                                                 |        |         |      |       |      |     |
| NY-TC250              | Osawa, Mashiko-machi, Haga-gun, Tochigi          | 17 March 2015    | <i>N. jonquilla</i>                       | Symptomless   | 10                                                                                                 |        |         |      | 10    |      |     |
| NY-TC251              | Nogoya-machi, Utsunomiya, Tochigi                | 17 March 2015    | <i>N. tazetta</i> var. <i>chinensis</i>   | Yellowing     | 10                                                                                                 | 1 (1)  | 9 (4)   |      |       |      |     |
| NY-GM252              | Fujiki, Tomioka, Gunma                           | 17 March 2015    | <i>N. tazetta</i> var. <i>chinensis</i>   | Mild stripe   | 8                                                                                                  |        | 8 (3)   |      |       |      |     |
| NY-GM253              | Fujiki, Tomioka, Gunma                           | 17 March 2015    | <i>N. tazetta</i> var. <i>chinensis</i>   | Mild stripe   | ND                                                                                                 |        |         |      |       |      |     |
| NY-GM254              | Shiroishi, Fujioka, Gunma                        | 17 March 2015    | <i>N. tazetta</i> var. <i>chinensis</i>   | Severe stripe | ND                                                                                                 |        |         |      |       |      |     |
| NY-ST1                | Kamifukuoka, Fujimino, Saitama                   | 28 March 2010    | <i>N. tazetta</i> var. <i>chinensis</i>   | Mild stripe   | 9                                                                                                  |        | 8 (0)   | 1    |       |      |     |
| NY-ST2                | -, Toda, Saitama                                 | 30 March 2010    | <i>N. tazetta</i> var. <i>chinensis</i>   | Mild stripe   | 9                                                                                                  | 2 (2)  | 5 (0)   | 2    |       |      |     |
| NY-CB1                | Tokashiro, Kimitsu, Chiba                        | 26 March 2010    | <i>N. tazetta</i> var. <i>chinensis</i>   | Mild stripe   | 8                                                                                                  |        | 7 (7)   | 1    |       |      |     |
| NY-CB2                | Sotominowa, Kimitsu, Chiba                       | 26 March 2010    | <i>N. tazetta</i> var. <i>chinensis</i>   | Mild stripe   | 10                                                                                                 |        | 2 (1)   | 8    |       |      |     |
| NY-CB3                | Sotominowa, Kimitsu, Chiba                       | 26 March 2010    | <i>N. tazetta</i> var. <i>chinensis</i>   | Mild stripe   | 10                                                                                                 |        | 9 (9)   | 1    |       |      |     |
| NY-CB4                | Ezuki, Kyonan-machi, Awa-gun, Chiba              | 26 March 2010    | <i>N. tazetta</i> var. <i>chinensis</i>   | Mild stripe   | 10                                                                                                 |        | 10 (9)  |      |       |      |     |
| NY-CB5                | Ezuki, Kyonan-machi, Awa-gun, Chiba              | 26 March 2010    | <i>N. tazetta</i> var. <i>chinensis</i>   | Stripe        | 10                                                                                                 | 2 (2)  | 7 (6)   | 1    |       |      |     |
| NY-CB9                | Ezuki, Kyonan-machi, Awa-gun, Chiba              | 26 March 2010    | <i>N. tazetta</i> var. <i>chinensis</i>   | Mild stripe   | 9                                                                                                  |        | 4 (4)   | 5    |       |      |     |
| NY-CB91               | Ezuki, Kyonan-machi, Awa-gun, Chiba              | 22 November 2013 | <i>N. tazetta</i> var. <i>chinensis</i>   | Severe stripe | 18                                                                                                 | 13 (5) | 5 (2)   |      |       |      |     |
| NY-CB247              | Ezuki, Kyonan-machi, Awa-gun, Chiba              | 17 March 2015    | <i>N. tazetta</i> var. <i>chinensis</i>   | Stripe        | 10                                                                                                 |        | 4 (2)   | 6    |       |      |     |
| NY-TK2                | -, Koutou-ku, Tokyo                              | 25 February 2010 | <i>N. tazetta</i> var. <i>chinensis</i>   | Mild stripe   | 10                                                                                                 |        | 10 (10) |      |       |      |     |
| NY-TK4                | -, Akishima, Tokyo                               | 28 March 2010    | <i>N. tazetta</i> var. <i>chinensis</i>   | Mild stripe   | 10                                                                                                 |        | 5 (4)   | 5    |       |      |     |
| NY-TK243              | -, Ota-ku, Tokyo                                 | 17 March 2015    | <i>N. tazetta</i> var. <i>chinensis</i>   | Severe stripe | 10                                                                                                 |        | 10 (3)  |      |       |      |     |
| NY-KN1                | Hasse-machi, Miura, Kanagawa                     | 27 March 2010    | <i>N. tazetta</i> var. <i>chinensis</i>   | Mild stripe   | 18                                                                                                 |        | 10 (3)  |      |       | 8    |     |
| NY-KN2                | Jogashima, Misaki, Miura, Kanagawa               | 27 March 2010    | <i>N. tazetta</i> var. <i>chinensis</i>   | Symptomless   | ND                                                                                                 |        |         |      |       |      |     |
| NY-KN3                | Jogashima, Misaki, Miura, Kanagawa               | 27 March 2010    | <i>N. tazetta</i> var. <i>chinensis</i>   | Symptomless   | ND                                                                                                 |        |         |      |       |      |     |
| NY-KN4                | Jogashima, Misaki, Miura, Kanagawa               | 27 March 2010    | <i>N. tazetta</i> var. <i>chinensis</i>   | Symptomless   | ND                                                                                                 |        |         |      |       |      |     |
| NY-KN5                | Jogashima, Misaki, Miura, Kanagawa               | 27 March 2010    | <i>N. tazetta</i> var. <i>chinensis</i>   | Symptomless   | ND                                                                                                 |        |         |      |       |      |     |
| NY-KN6                | Oba, Fujisawa, Kanagawa                          | 27 March 2010    | <i>N. tazetta</i> var. <i>chinensis</i>   | Mild stripe   | 9                                                                                                  |        | 8 (8)   | 1    |       |      |     |
| NY-KN7                | Oba, Fujisawa, Kanagawa                          | 27 March 2010    | <i>N. tazetta</i> var. <i>chinensis</i>   | Mild stripe   | 9                                                                                                  |        | 9 (3)   |      |       |      |     |
| NY-KN8                | Sekiguchi, Atsugi, Kanagawa                      | 28 March 2010    | <i>N. tazetta</i> var. <i>chinensis</i>   | Mild stripe   | 8                                                                                                  |        | 8 (3)   |      |       |      |     |
| NY-KN9                | -, Atsugi, Kanagawa                              | 28 March 2010    | <i>N. tazetta</i> var. <i>chinensis</i>   | Mild stripe   | 9                                                                                                  |        | 9 (3)   |      |       |      |     |
| <b>Chubu district</b> |                                                  |                  |                                           |               |                                                                                                    |        |         |      |       |      |     |
| NY-NI7                | -, -, Niigata                                    | 5 April 2010     | <i>Narcissus tazetta</i> var. Scarlet gem | Symptomless   | ND                                                                                                 |        |         |      |       |      |     |
| NY-NI260              | Osato, Agano, Niigata                            | 23 April 2015    | <i>N. tazetta</i> var. <i>chinensis</i>   | Mild stripe   | ND                                                                                                 |        |         |      |       |      |     |
| NY-NI263              | Kuraoka, Konan-ku, Niigata, Niigata              | 24 April 2015    | <i>N. tazetta</i> var. <i>chinensis</i>   | Mild stripe   | 9                                                                                                  |        | 9 (2)   |      |       |      |     |
| NY-TY73A              | -, -, Toyama                                     | 11 November 2013 | <i>N. tazetta</i>                         | Symptomless   | 4                                                                                                  |        | 4 (3)   |      |       |      |     |
| NY-FI3                | Hamakitayama, Fukui, Fukui                       | 17 January 2012  | <i>N. tazetta</i> var. <i>chinensis</i>   | Mild stripe   | 8                                                                                                  | 2 (2)  | 7 (5)   |      |       |      |     |
| NY-FI9                | Hamakitayama, Fukui, Fukui                       | 17 January 2012  | <i>N. tazetta</i> var. <i>chinensis</i>   | Mild stripe   | 17                                                                                                 | 13 (6) | 1 (1)   | 3    |       |      |     |
| NY-FI11               | Hamakitayama, Fukui, Fukui                       | 17 January 2012  | <i>N. tazetta</i> var. <i>chinensis</i>   | Mild stripe   | 10                                                                                                 | 3 (3)  | 7 (6)   |      |       |      |     |
| NY-FI15               | Gamo, Fukui, Fukui                               | 8 March 2012     | <i>N. tazetta</i> var. <i>chinensis</i>   | Mild stripe   | ND                                                                                                 |        |         |      |       |      |     |
| NY-FI23               | Hamakitayama, Fukui, Fukui                       | 8 March 2012     | <i>N. tazetta</i> var. <i>chinensis</i>   | Stripe        | 9                                                                                                  | 9 (5)  |         |      |       |      |     |
| NY-FI29               | Nashigadaira, Echizen-cho, Nyuu, Fukui           | 8 March 2012     | <i>N. tazetta</i> var. <i>chinensis</i>   | Stripe        | 10                                                                                                 |        | 10 (7)  |      |       |      |     |
| NY-FI30               | Nashigadaira, Echizen-cho, Nyuu, Fukui           | 8 March 2012     | <i>N. tazetta</i> var. <i>chinensis</i>   | Stripe        | 9                                                                                                  | 1 (1)  | 8 (8)   |      |       |      |     |
| NY-FI33               | Chigadaira, Echizen-cho, Nyuu, Fukui             | 8 March 2012     | <i>N. tazetta</i> var. <i>chinensis</i>   | Stripe        | 18                                                                                                 | 8 (2)  | 10 (2)  |      |       |      |     |
| NY-NN75A              | Hananoyamato, Daiichi Engei, Nagano              | 11 November 2013 | <i>Narcissus tazetta odor</i>             |               | ND                                                                                                 |        |         |      |       |      |     |



Table S1. Continued.

| Plant (Isolate)         | Location (town, city, prefecture)        | Collection date  | Host                                                 | Symptom        | Number of clones partially sequenced <sup>2</sup> (number of clones fully sequenced <sup>3</sup> ) |        |        |      |       |      |     |
|-------------------------|------------------------------------------|------------------|------------------------------------------------------|----------------|----------------------------------------------------------------------------------------------------|--------|--------|------|-------|------|-----|
|                         |                                          |                  |                                                      |                | Total                                                                                              | NDV    | NLSYV  | NYSV | CyEVA | OrMV | NLV |
| NY-SH216                | Suzaki, Shimoda, Shizuoka                | 7 December 2014  | <i>N. tazzeta</i> var. <i>chinensis</i>              | Mosaic         | 10                                                                                                 |        |        | 10   |       |      |     |
| NY-SH219                | Komakado, Gotemba, Shizuoka              | 7 December 2014  | <i>N. tazzeta</i> var. <i>chinensis</i>              | Stripe         | 10                                                                                                 |        | 10 (2) |      |       |      |     |
| NY-SH236                | Takasaki, Yaizu, Shizuoka                | 25 January 2015  | <i>N. tazzeta</i> var. <i>chinensis</i>              | Severe stripe  | 10                                                                                                 |        | 9 (2)  |      |       |      |     |
| NY-AC230                | Sannomaru, Naka-ku, Nagoya, Aichi        | 25 January 2015  | <i>N. tazzeta</i> var. <i>chinensis</i>              | Severe stripe  | 19                                                                                                 | 13 (3) | 2 (2)  | 4    |       |      |     |
| NY-AC233                | Zoshi, Toyokawa, Aichi                   | 25 January 2015  | <i>N. tazzeta</i> var. <i>chinensis</i>              | Severe stripe  | 9                                                                                                  | 2 (2)  | 7 (2)  |      |       |      |     |
| NY-AC234                | Nagasawa-cho, Toyokawa, Aichi            | 25 January 2015  | <i>N. tazzeta</i> var. <i>chinensis</i>              | Mild stripe    | ND                                                                                                 |        |        |      |       |      |     |
| <b>Kinki district</b>   |                                          |                  |                                                      |                |                                                                                                    |        |        |      |       |      |     |
| NY-ME224                | Koazaka-cho, Matsuzaka, Mie              | 24 January 2015  | <i>N. tazzeta</i> var. <i>chinensis</i>              | Stripe         | 9                                                                                                  |        | 9 (2)  |      |       |      |     |
| NY-ME226                | Shihikida, Taki-cho, Taki-gun, Mie       | 24 January 2015  | <i>N. tazzeta</i> var. <i>chinensis</i>              | Stripe         | ND                                                                                                 |        |        |      |       |      |     |
| NY-ME229                | Komei-cho, Tsu, Mie                      | 24 January 2015  | <i>N. tazzeta</i> var. <i>chinensis</i>              | Stripe         | 19                                                                                                 | 17 (7) |        | 2    |       |      |     |
| NY-KY83                 | -, -, Kyoto                              | 19 November 2013 | <i>Narcissus bulbocidum</i>                          | Symptomless    | ND                                                                                                 |        |        |      |       |      |     |
| NY-KY84                 | -, -, Kyoto                              | 19 November 2013 | <i>N. bulbocidum</i>                                 | Symptomless    | ND                                                                                                 |        |        |      |       |      |     |
| NY-OS1                  | Minowa, Toyonaka, Osaka                  | 10 March 2012    | <i>N. tazzeta</i> var. <i>chinensis</i>              | Stripe         | 7                                                                                                  |        | 4 (3)  | 3    |       |      |     |
| NY-OS2                  | Himemuro, Ikeda, Osaka                   | 10 March 2012    | <i>N. tazzeta</i> var. <i>chinensis</i>              | Stripe         | 7                                                                                                  |        | 7 (3)  |      |       |      |     |
| NY-HG1                  | -, Awaji, Hyogo                          | 12 March 2011    | <i>N. tazzeta</i> var. <i>chinensis</i>              | Mild stripe    | ND                                                                                                 |        |        |      |       |      |     |
| NY-HG3                  | Ichinomiya, Awaji, Hyogo                 | 12 March 2011    | <i>N. pseudonarcisus</i>                             | Stripe         | 8                                                                                                  |        |        | 4    | 4     |      |     |
| NY-HG5                  | Ichinomiya, Awaji, Hyogo                 | 12 March 2011    | <i>N. tazzeta</i> var. <i>chinensis</i>              | Severe mosaic  | ND                                                                                                 |        |        |      |       |      |     |
| NY-HG6                  | Ichinomiya, Awaji, Hyogo                 | 12 March 2011    | <i>N. tazzeta</i> var. <i>chinensis</i>              | Severe mosaic  | ND                                                                                                 |        |        |      |       |      |     |
| NY-HG8                  | Nadakuroiwa, Minamiawaji, Hyogo          | 12 March 2011    | <i>N. tazzeta</i> var. <i>chinensis</i>              | Stripe         | 16                                                                                                 | 9 (6)  | 1 (1)  | 6    |       |      |     |
| NY-HG10                 | Nadakuroiwa, Minamiawaji, Hyogo          | 12 March 2011    | <i>N. tazzeta</i> var. <i>chinensis</i>              | Stripe         | 10                                                                                                 | 7 (4)  | 2 (1)  | 1    |       |      |     |
| NY-HG11                 | Yura-cho, Sumoto, Hyogo                  | 12 March 2011    | <i>N. tazzeta</i> var. <i>chinensis</i>              | Stripe         | 10                                                                                                 |        | 10 (0) |      |       |      |     |
| NY-HG13                 | Hon-machi, Himeji, Hyogo                 | 14 March 2011    | <i>N. tazzeta</i> var. <i>chinensis</i>              | Mosaic, stripe | ND                                                                                                 |        |        |      |       |      |     |
| NY-HG16                 | Amida-cho, Takasago, Hyogo               | 14 March 2011    | <i>N. tazzeta</i> var. <i>chinensis</i>              | Stripe         | 6                                                                                                  |        | 1 (3)  | 5    |       |      |     |
| NY-HG19                 | Kukuchinishi-cho, Amagasaki, Hyogo       | 10 March 2012    | <i>N. tazzeta</i> var. <i>chinensis</i>              | Stripe         | 11                                                                                                 |        |        | 11   |       |      |     |
| NY-HG20                 | Meishin-cho, Amagasaki, Hyogo            | 10 March 2012    | <i>N. tazzeta</i> var. <i>chinensis</i>              | Stripe         | 9                                                                                                  | 8 (7)  | 1 (1)  |      |       |      |     |
| NY-HG25                 | Akurakita, Takarazuka, Hyogo             | 10 March 2012    | <i>N. tazzeta</i> var. <i>chinensis</i>              | Stripe         | 10                                                                                                 |        | 10 (8) |      |       |      |     |
| NY-HG24                 | Sakae, Takarazuka, Hyogo                 | 10 March 2012    | <i>N. tazzeta</i> var. <i>chinensis</i>              | Stripe         | ND                                                                                                 |        |        |      |       |      |     |
| NY-HG27                 | Kamo, Kawanishi, Hyogo                   | 10 March 2012    | <i>N. tazzeta</i> var. <i>chinensis</i>              | Stripe         | 16                                                                                                 |        |        | 16   |       |      |     |
| <b>Chugoku district</b> |                                          |                  |                                                      |                |                                                                                                    |        |        |      |       |      |     |
| NY-SM69A                | Unknown, Shimane                         | 11 November 2013 | <i>Narcissus bulbocidum</i> var. <i>monoophyllus</i> | Symptomless    | 10                                                                                                 |        | 1 (1)  |      |       | 9    |     |
| NY-OY1                  | Kotsu, Higashi-ku, Okayama, Okayama      | 13 March 2011    | <i>N. tazzeta</i> var. <i>chinensis</i>              | Stripe         | 9                                                                                                  |        | 4 (1)  | 5    |       |      |     |
| NY-OY41                 | Kuma, Kita-ku, Okayama, Okayama          | 9 March 2013     | <i>N. tazzeta</i> var. <i>chinensis</i>              | Mild stripe    | ND                                                                                                 |        |        |      |       |      |     |
| NY-HR36                 | Yanohigashi, Akiku, Hiroshima, Hiroshima | 8 March 2013     | <i>N. tazzeta</i> var. <i>chinensis</i>              | Mild stripe    | 7                                                                                                  |        |        | 7    |       |      |     |
| NY-HR38                 | Ushirogake, Kawajiri, Kure, Hiroshima    | 8 March 2013     | <i>N. tazzeta</i> var. <i>chinensis</i>              | Mild stripe    | 9                                                                                                  |        |        | 9    |       |      |     |
| NY-HR39                 | Sunami, Mihara, Hiroshima                | 8 March 2013     | <i>N. tazzeta</i> var. <i>chinensis</i>              | Mild stripe    | 7                                                                                                  |        | 7 (3)  |      |       |      |     |
| NY-HR40                 | Higashitetsu, Fukuyama, Hiroshima        | 9 March 2013     | <i>N. tazzeta</i> var. <i>chinensis</i>              | Mild stripe    | 20                                                                                                 | 20 (6) |        |      |       |      |     |
| NY-YM2                  | Chinto, Hagi, Yamaguchi                  | 26 February 2011 | <i>N. tazzeta</i> var. <i>chinensis</i>              | Stripe         | 10                                                                                                 | 6 (5)  | 4 (4)  |      |       |      |     |
| NY-YM5                  | Nabe-cho, Shimonoseki, Yamaguchi         | 27 February 2011 | <i>N. tazzeta</i> var. <i>chinensis</i>              | Stripe         | 10                                                                                                 | 5 (5)  | 3 (2)  | 2    |       |      |     |
| <b>Shikoku district</b> |                                          |                  |                                                      |                |                                                                                                    |        |        |      |       |      |     |
| NY-TS158                | Kizuno, Otsu-cho, Naruto, Tokushima      | 24 April 2014    | <i>N. tazzeta</i> var. <i>chinensis</i>              | Symptomless    | 3                                                                                                  |        |        |      |       |      | 3   |
| NY-TS159                | Kizuno, Otsu-cho, Naruto, Tokushima      | 24 April 2014    | <i>N. tazzeta</i> var. <i>chinensis</i>              | Symptomless    | ND                                                                                                 |        |        |      |       |      |     |
| NY-TS160                | Yoshinaga, Otsu-cho, Naruto, Tokushima   | 26 April 2014    | <i>N. tazzeta</i> var. <i>chinensis</i>              | Mild stripe    | ND                                                                                                 |        |        |      |       |      |     |
| NY-TS161                | -, Mima, Tokushima                       | 26 April 2014    | <i>N. tazzeta</i> var. <i>chinensis</i>              | Symptomless    | ND                                                                                                 |        |        |      |       |      |     |
| NY-KW1                  | Ejiri-cho, Sakaide, Kagawa               | 13 March 2011    | <i>N. tazzeta</i> var. <i>chinensis</i>              | Stripe         | 13                                                                                                 | 9 (5)  | 4 (2)  |      |       |      |     |
| NY-KW2                  | Oumi, Sakaide, Kagawa                    | 13 March 2011    | <i>N. tazzeta</i> var. <i>chinensis</i>              | Mild stripe    | 3                                                                                                  |        |        |      | 3     |      |     |
| NY-KW3                  | Oumi, Sakaide, Kagawa                    | 13 March 2011    | <i>N. tazzeta</i> var. <i>chinensis</i>              | Stripe         | 10                                                                                                 |        |        | 10   |       |      |     |
| NY-KW4                  | Ikushima-cho, Takamatsu, Kagawa          | 13 March 2011    | <i>N. tazzeta</i> var. <i>chinensis</i>              | Stripe         | 8                                                                                                  |        | 8 (3)  |      |       |      |     |
| NY-KW5                  | Nakayama-cho, Takamatsu, Kagawa          | 13 March 2011    | <i>N. pseudonarcisus</i>                             | Mosaic         | 7                                                                                                  |        |        |      |       | 7    |     |
| NY-KW6                  | Danshi-cho, Takamatsu, Kagawa            | 13 March 2011    | <i>N. tazzeta</i> var. <i>chinensis</i>              | Mosaic         | 8                                                                                                  |        |        | 8    |       |      |     |
| NY-EH171                | Takanoko-cho, Matsuyama, Ehime           | 26 April 2014    | <i>N. tazzeta</i> var. <i>chinensis</i>              | Stripe         | 10                                                                                                 | 3 (2)  |        | 7    |       |      |     |
| NY-EH173                | Kurumi, Tambara-cho, Saijo, Ehime        | 26 April 2014    | <i>N. tazzeta</i> var. <i>chinensis</i>              | Severe stripe  | 10                                                                                                 |        | 10 (0) |      |       |      |     |
| NY-KO163                | Otesuji, Kochi, Kochi                    | 25 April 2014    | <i>N. tazzeta</i> var. <i>chinensis</i>              | Unclear        | ND                                                                                                 |        |        |      |       |      |     |
| NY-KO164                | Aioi-cho, Kochi, Kochi                   | 25 April 2014    | <i>N. tazzeta</i> var. <i>chinensis</i>              | Unclear        | 9                                                                                                  |        |        | 9    |       |      |     |
| NY-KO165                | Ikku, Kochi, Kochi                       | 25 April 2014    | <i>N. tazzeta</i> var. <i>chinensis</i>              | Stripe         | ND                                                                                                 |        |        |      |       |      |     |

Table S1. Continued.

| Plant (Isolate)                       | Location (town, city, prefecture)      | Collection date  | Host                                    | Symptom              | Number of clones partially sequenced <sup>2</sup> (number of clones fully sequenced <sup>3</sup> ) |        |        |       |       |      |     |
|---------------------------------------|----------------------------------------|------------------|-----------------------------------------|----------------------|----------------------------------------------------------------------------------------------------|--------|--------|-------|-------|------|-----|
|                                       |                                        |                  |                                         |                      | Total                                                                                              | NDV    | NLSYV  | NYSV  | CyEVA | OrMV | NLV |
| Kyushu and Okinawa district (islands) |                                        |                  |                                         |                      |                                                                                                    |        |        |       |       |      |     |
| NY-F1                                 | -, Okawa, Fukuoka                      | 20 March 2010    | <i>N. tazzeta</i> var. <i>chinensis</i> | Mosaic               | 10                                                                                                 | 4 (3)  | 3 (3)  | 3     |       |      |     |
| NY-F2                                 | Yamakawa-machi, Miyama, Fukuoka        | 24 January 2011  | <i>N. tazzeta</i> var. <i>chinensis</i> | Mild stripe          | 7                                                                                                  |        | 7 (3)  |       |       |      |     |
| NY-F8                                 | Kawabaru, Itoshima, Fukuoka            | 11 December 2011 | <i>N. tazzeta</i> var. <i>chinensis</i> | Mild yellow stripe   | 9                                                                                                  |        | 9 (3)  |       |       |      |     |
| NY-F9                                 | Misaka, Itoshima, Fukuoka              | 11 December 2011 | <i>N. tazzeta</i> var. <i>chinensis</i> | Mild yellow stripe   | 6                                                                                                  |        |        | 6     |       |      |     |
| NY-SG8                                | Hyogo-machi, Saga, Saga                | 14 March 2010    | <i>N. tazzeta</i> var. <i>chinensis</i> | Mosaic               | 10                                                                                                 | 8 (8)  | 2 (2)  |       |       |      |     |
| NY-SG10                               | Honjo-machi, Saga, Saga                | 14 January 2011  | <i>N. tazzeta</i> var. <i>chinensis</i> | Mosaic, stripe       | ND                                                                                                 |        |        |       |       |      |     |
| NY-SG12                               | Honjo-machi, Saga, Saga                | 8 January 2013   | <i>N. tazzeta</i> var. <i>chinensis</i> | Stripe               | 9                                                                                                  | 6 (3)  | 3 (3)  |       |       |      |     |
| NY-N2                                 | Kunimi-cho, Unzen, Nagasaki            | 6 March 2009     | <i>N. tazzeta</i> var. <i>chinensis</i> | Symptomless          | ND                                                                                                 |        |        |       |       |      |     |
| NY-N6                                 | Kayaki-cho, Nagasaki, Nagasaki         | 27 February 2010 | <i>N. tazzeta</i> var. <i>chinensis</i> | Mild yellow stripe   | ND                                                                                                 |        |        |       |       |      |     |
| NY-N9                                 | Kurohama-machi, Nagasaki, Nagasaki     | 27 February 2010 | <i>N. tazzeta</i> var. <i>chinensis</i> | Mosaic               | 11                                                                                                 | 9 (9)  | 2 (2)  |       |       |      |     |
| NY-N12                                | Nomozaki, Nomo-cho, Nagasaki, Nagasaki | 27 February 2010 | <i>N. tazzeta</i> var. <i>chinensis</i> | Yellow stripe        | 8                                                                                                  |        | 8 (3)  |       |       |      |     |
| NY-N13                                | Nomozaki, Nomo-cho, Nagasaki, Nagasaki | 27 February 2010 | <i>N. tazzeta</i> var. <i>chinensis</i> | Mild yellow stripe   | ND                                                                                                 |        |        |       |       |      |     |
| NY-N14                                | Nomozaki, Nomo-cho, Nagasaki, Nagasaki | 27 February 2010 | <i>N. tazzeta</i> var. <i>chinensis</i> | Mosaic               | 15                                                                                                 | 6 (2)  | 1 (1)  | 7     |       |      |     |
| NY-N15                                | Uki-machi, Isahaya, Nagasaki           | 27 February 2010 | <i>N. tazzeta</i> var. <i>chinensis</i> | Yellow stripe        | 10                                                                                                 |        | 4 (3)  | 6     |       |      |     |
| NY-N18                                | Obama-cho, Unzen, Nagasaki             | 28 February 2010 | <i>N. tazzeta</i> var. <i>chinensis</i> | Yellow stripe        | ND                                                                                                 |        |        |       |       |      |     |
| NY-N19                                | Arima-cho, Minamishimabara, Nagasaki   | 28 February 2010 | <i>N. tazzeta</i> var. <i>chinensis</i> | Yellow stripe        | 15                                                                                                 |        | 4 (3)  | 1     | 10    |      |     |
| NY-N20                                | Ariake-cho, Shimabara, Nagasaki        | 28 February 2010 | <i>N. tazzeta</i> var. <i>chinensis</i> | Yellow stripe        | 10                                                                                                 |        |        | 10    |       |      |     |
| NY-KM10                               | Miyabara, Arao, Kumamoto               | 23 January 2011  | <i>N. tazzeta</i> var. <i>chinensis</i> | Mild stripe          | 10                                                                                                 |        |        | 10    |       |      |     |
| NY-KM1P                               | Miyabara, Arao, Kumamoto               | 23 January 2011  | <i>N. tazzeta</i> var. <i>chinensis</i> | Mild stripe          | 10                                                                                                 |        |        | 10    |       |      |     |
| NY-KM9                                | Ozu-machi, Kikuchi-gun, Kumamoto       | 28 March 2011    | <i>N. tazzeta</i> var. <i>chinensis</i> | Severe stripe        | 10                                                                                                 | 8 (7)  | 2 (2)  |       |       |      |     |
| NY-OI1                                | Takasakiyama, Kozaki, Oita, Oita       | 26 February 2012 | <i>N. tazzeta</i> var. <i>chinensis</i> | Yellow stripe        | 10                                                                                                 |        |        | 10    |       |      |     |
| NY-OI2                                | Takasakiyama, Kozaki, Oita, Oita       | 26 February 2012 | <i>N. tazzeta</i> var. <i>chinensis</i> | Yellow stripe        | 10                                                                                                 |        |        | 10    |       |      |     |
| NY-OI3                                | Takasakiyama, Kozaki, Oita, Oita       | 26 February 2012 | <i>N. tazzeta</i> var. <i>chinensis</i> | Yellow stripe        | 10                                                                                                 |        |        | 10    |       |      |     |
| NY-OI4                                | Tanoyu-machi, Beppu, Oita              | 26 February 2012 | <i>N. tazzeta</i> var. <i>chinensis</i> | Yellow stripe        | 11                                                                                                 |        | 3 (3)  | 8     |       |      |     |
| NY-OI5                                | Tanoyu-machi, Beppu, Oita              | 26 February 2012 | <i>N. tazzeta</i> var. <i>chinensis</i> | Yellow stripe        | 8                                                                                                  |        |        | 8     |       |      |     |
| NY-OI12                               | Fujimi-cho, Beppu, Oita                | 26 February 2012 | <i>N. tazzeta</i> var. <i>chinensis</i> | Yellow stripe        | 9                                                                                                  |        | 3      | 6 (3) |       |      |     |
| NY-OI13                               | Tenman-cho, Beppu, Oita                | 26 February 2012 | <i>N. tazzeta</i> var. <i>chinensis</i> | Yellow stripe        | 10                                                                                                 |        |        | 10    |       |      |     |
| NY-OI14                               | Tenman-cho, Beppu, Oita                | 26 February 2012 | <i>N. tazzeta</i> var. <i>chinensis</i> | Mild yellow stripe   | ND                                                                                                 |        |        |       |       |      |     |
| NY-M1                                 | Higashinagaaura, Ebino, Miyazaki       | 7 May 2012       | <i>N. tazzeta</i> var. <i>chinensis</i> | Mosaic               | 3                                                                                                  |        |        |       |       |      | 3   |
| NY-M2                                 | Higashinagaaura, Ebino, Miyazaki       | 7 May 2012       | <i>N. tazzeta</i> var. <i>chinensis</i> | Yellow stripe        | 7                                                                                                  |        |        | 6     | 1     |      |     |
| NY-M3                                 | Suenaga, Ebino, Miyazaki               | 7 May 2012       | <i>N. tazzeta</i> var. <i>chinensis</i> | Yellow stripe        | ND                                                                                                 |        |        |       |       |      |     |
| NY-M4                                 | Takaharu, Nishimorokata-gun, Miyazaki  | 7 May 2012       | <i>N. tazzeta</i> var. <i>chinensis</i> | Severe yellow stripe | 10                                                                                                 |        | 10 (5) |       |       |      |     |
| NY-M5                                 | Takazaki-cho, Miyakonojo, Miyazaki     | 7 May 2012       | <i>N. tazzeta</i> var. <i>chinensis</i> | Yellow stripe        | ND                                                                                                 |        |        |       |       |      |     |
| NY-M77                                | -, -, Miyazaki                         | 15 November 2013 | <i>N. tazzeta</i> var. <i>chinensis</i> | Stripe               | 10                                                                                                 |        | 10 (4) |       |       |      |     |
| NY-KG1                                | Tokunoshima-cho, Oshima-gun, Kagoshima | 22 January 2010  | <i>N. tazzeta</i> var. <i>chinensis</i> | Yellow stripe        | 10                                                                                                 |        |        | 10    |       |      |     |
| NY-KG2                                | Tokunoshima-cho, Oshima-gun, Kagoshima | 22 January 2010  | <i>N. tazzeta</i> var. <i>chinensis</i> | Mild yellow stripe   | 9                                                                                                  |        | 6 (3)  | 3     |       |      |     |
| NY-KG6                                | Tenokuchi, Kagoshima, Kagoshima        | 16 February 2012 | <i>N. tazzeta</i> var. <i>chinensis</i> | Yellow stripe        | 9                                                                                                  |        | 9 (3)  |       |       |      |     |
| NY-KG7                                | Tenokuchi, Kagoshima, Kagoshima        | 16 February 2012 | <i>N. tazzeta</i> var. <i>chinensis</i> | Yellow stripe        | ND                                                                                                 |        |        |       |       |      |     |
| NY-KG8                                | Yamanokuchi, Kagoshima, Kagoshima      | 16 February 2012 | <i>N. tazzeta</i> var. <i>chinensis</i> | Yellow stripe        | ND                                                                                                 |        |        |       |       |      |     |
| NY-KG9                                | Uenosono-cho, Kagoshima, Kagoshima     | 16 February 2012 | <i>N. tazzeta</i> var. <i>chinensis</i> | Yellow stripe        | 6                                                                                                  |        | 6 (3)  |       |       |      |     |
| NY-KG10                               | Uearata-cho, Kagoshima, Kagoshima      | 16 February 2012 | <i>N. tazzeta</i> var. <i>chinensis</i> | Severe yellow stripe | 13                                                                                                 | 12 (6) |        | 1     |       |      |     |
| NY-KG11                               | Uearata-cho, Kagoshima, Kagoshima      | 16 February 2012 | <i>N. tazzeta</i> var. <i>chinensis</i> | Yellow stripe        | 6                                                                                                  | 6 (2)  |        |       |       |      |     |
| NY-KG12                               | Arata-cho, Kagoshima, Kagoshima        | 16 February 2012 | <i>N. tazzeta</i> var. <i>chinensis</i> | Yellow stripe        | 9                                                                                                  |        |        | 9     |       |      |     |
| NY-KG13                               | Uearata-cho, Kagoshima, Kagoshima      | 16 February 2012 | <i>N. tazzeta</i> var. <i>chinensis</i> | Yellow stripe        | 10                                                                                                 |        | 10 (3) |       |       |      |     |
| NY-OK98                               | Kyoda, Nago, Okinawa                   | 25 January 2014  | <i>N. tazzeta</i> var. <i>chinensis</i> | Severe mosaic        | 10                                                                                                 |        |        | 10    |       |      |     |
| NY-OK100                              | Kyoda, Nago, Okinawa                   | 25 January 2014  | <i>N. tazzeta</i> var. <i>chinensis</i> | Stripe               | 6                                                                                                  |        |        | 6     |       |      |     |



**Table S2. Primers used for RT-PCR amplification and sequencing in this study.**

**A. Narcissus late season yellows virus and potyvirus specific primers used for RT-PCR amplification.**

| Primer name    | Type    | Position <sup>1</sup> | Region <sup>2</sup> | Sequence (5'-3') <sup>3</sup>                       |
|----------------|---------|-----------------------|---------------------|-----------------------------------------------------|
| TU5TNOT5P      | Forward | 1-24                  | 5'NCR               | GGGGCGGCCGCAAAAAATATAAAAACTCAACACAACA               |
| TU5TNOT500P    | Forward | 1-25                  | 5'NCR               | GGGGCGGCCGCAAAAAATATAAAAACTCAACACAACMA              |
| POTYP1PONOT38P | Forward | 3073-3094             | P3                  | GGGGCGGCCGCATATGGGGTGAGAGAGGATTTARRMGGCAGATACRGGC   |
| NLCINOT272M    | Reverse | 3819-3840             | CI                  | GGGGCGGCCGCTTCTGTTCGATAATGCGGCACC                   |
| NLCINOT204M    | Reverse | 3842-3863             | CI                  | GGGGCGGCCGCTYGTAAATGTACAGATGTC                      |
| NLCINOT205M    | Reverse | 3842-3863             | CI                  | GGGGCGGCCGCTCGTGAATGTACAGATGTC                      |
| NLCINOT273M    | Reverse | 3941-3962             | CI                  | GGGGCGGCCGCGGTAAACAGTCGATTTTCCAG                    |
| NL6K2NOT99P    | Forward | 5626-5647             | 6K2                 | GGGGCGGCCGCTGYCTGGGYATTAAAGGAAGGT                   |
| NLVPNOT100P    | Forward | 6059-6080             | VPg                 | GGGGCGGCCGCTCACGSTWATRCGAGARGAGAA                   |
| NLNANOT271M    | Reverse | 6460-6481             | Nla-Pro             | GGGGCGGCCGCGCRAAGAGGTGCCTATTTGTAAG                  |
| NLNANOT129M    | Reverse | 6586-6607             | Nla-Pro             | GGGGCGGCCGCGCCTCTTTGGTAACTTACAAAG                   |
| NLNANOT130M    | Reverse | 6586-6607             | Nla-Pro             | GGGGCGGCCGCGCATCTTTWGGTAGTCTGACAAG                  |
| NLSNANOT33M    | Reverse | 6588-6610             | Nla-Pro             | GGGGCGGCCGCGRACATCTTTWGGTAGTCTGACA                  |
| NLNANOT61P     | Forward | 6741-6763             | Nla-Pro             | GGGGCGGCCGCGGGGAGCAATTTTGGAAACACT                   |
| POTYNIBNOT4P   | Forward | 7670-7691             | Nlb                 | GGGGCGGCCGCGATATGGGGTGAGAGAGGTNTGYGTNGAYGAYTTYAAYAA |
| NLNIBNOT146P   | Forward | 8497-8518             | Nlb                 | GGGGCGGCCGCGAGACAGCTTTGCGAAAACCTCT                  |
| NLCPNOT101M    | Reverse | 9495-9521             | 3'NCR               | GGGGCGGCCGCHHTYKTTGTGATAATATTTCTCTATAGT             |
| NL3TNOT225M    | Reverse | 9534-9554             | 3'NCR               | GGGGCGGCCGCAAGAGTACGTTCTTGGCTGTG                    |
| NL3TNOT196M    | Reverse | 9534-9554             | 3'NCR               | GGGGCGGCCGCAAGATTACATTCTTGGCAGCG                    |
| TU3T9M         | Reverse | Poly A                | Poly A              | GGGGCGGCCGCTTTTTTTTTTTTTTTTTTTTTTTTTTTTTT           |

<sup>1</sup> Correspond to the position in the genome of Zhangzhou isolate [26].

<sup>2</sup> 5'NCR; 5' non-coding region, P3; third protein, CI; cylindrical inclusion protein, 6K2; 6Kda 2 protein, VPg; genome-linked viral protein, Nla-Pro; nuclear inclusion a protein-proteinase protein, Nlb; nuclear inclusion b protein, 3'NCR; 3' non-coding region, Poly A; Poly (A) tail.

<sup>3</sup> R; G+A, Y; C+T, S; G+C, M; A+C, W; A+T, K, T+G, V; A+C+G, D; A+T+G, H; A+T+C, N; A+T+G+C

GCGGCCGC; NotI restriction site

**B. Narcissus degeneration virus and potyvirus- and onion yellow dwarf virus phylogenetic group-specific primers used for RT-PCR amplification.**

| Primer name  | Type    | Position <sup>1</sup> | Region <sup>2</sup> | Sequence amplification (5'-3') <sup>3</sup>         |
|--------------|---------|-----------------------|---------------------|-----------------------------------------------------|
| ND5T4P       | Forward | 1-23                  | 5'NCR               | GGGGCGGCCGCAAAATTATAAAATCACATAACAAA                 |
| NDHCNOT315P  | Forward | 1976-1997             | HC-Pro              | GGGGCGGCCGCTCTGAATCAACCGATTATGAC                    |
| NDHCNOT316M  | Reverse | 2403-2424             | HC-Pro              | GGGGCGGCCGCGCCAAGGTCTTAACGACTTTGTC                  |
| NDHCNOT95P   | Forward | 2441-2463             | HC-Pro              | GGGGCGGCCGCGAAAGATGTCGCGACCATGCTAG                  |
| NDP3NOT74P   | Forward | 2810-2832             | P3                  | GGGGCGGCCGCTTGTYYAAGGAATTGATGGGGG                   |
| NDP3NOT317M  | Reverse | 2820-2841             | P3                  | GGGGCGGCCGCTGAAGATGGCCCCCATCAATTC                   |
| NDP3NOT270P  | Forward | 3165-3186             | P3                  | GGGGCGGCCGCTACGCCGAGAATCAACAAGC                     |
| NDCINOT269M  | Reverse | 4014-4035             | CI                  | GGGGCGGCCGCTTATGTCGAAGTCCACAACCAG                   |
| NDCINOT97P   | Forward | 5415-5436             | CI                  | GGGGCGGCCGCTTTGGAGCTCGAGTGCAACTTC                   |
| ND6K2NOT288P | Forward | 5907-5928             | 6K2                 | GGGGCGGCCGCGCTTTGGATCTCAAAGGGACAT                   |
| NDVPNOT96M   | Reverse | 6486-6508             | VPg                 | GGGGCGGCCGCTGAGCTGGAACCAATCTGTCCG                   |
| NDNIA42M     | Reverse | 6711-6733             | Nla-Pro             | GGGGCGGCCGCTGATTGGCAATCATGTATGACCC                  |
| RGNDNIBNOT4P | Forward | 7724-7744             | Nlb                 | GGGGCGGCCGCGATATGGGGTGAGAGAGGRTAYSRWGGGAAGAAGAAGGA  |
| POTYNIBNOT4P | Forward | 7935-7957             | Nlb                 | GGGGCGGCCGCGATATGGGGTGAGAGAGGTNTGYGTNGAYGAYTTYAAYAA |
| NDNIBNOT73M  | Reverse | 8746-8770             | Nlb                 | GGGGCGGCCGCGCTGTATCTGCTAGATAAGGAGCCT                |
| NDCPNOT98M   | Reverse | 9014-9034             | CP                  | GGGGCGGCCGCGGAAACTTCATCTTGGAACTC                    |
| ND3TNOT268M  | Reverse | 9700-9721             | 3'NCR               | GGGGCGGCCGCGACTCCCTAAACTTGTACTTCAC                  |
| TU3T9M       | Reverse | PolyA                 | Poly A              | GGGGCGGCCGCTTTTTTTTTTTTTTTTTTTTTTTTTTTTTT           |

<sup>1</sup> Correspond to the position in the genome of Zhangzhou isolate [24].

<sup>2</sup> 5'NCR; 5' non-coding region, HC-Pro; helper component-proteinase protein, P3; protein 3, 6K1; CI; cylindrical inclusion protein, 6K2; 6Kda 2 protein, VPg; genome-linked viral protein, Nla-Pro; nuclear inclusion a-proteinase protein, Nlb; nuclear inclusion b protein, CP; coat protein, 3'NCR; 3' non-coding region, Poly A; Poly (A) tail.

<sup>3</sup> R; G+A, Y; C+T, S; G+C, M; A+C, W; A+T, K, T+G, V; A+C+G, D; A+T+G, H; A+T+C, N; A+T+G+C

GCGGCCGC; NotI restriction site

### C. Narcissus late season yellows virus specific primers used for sequencing.

| Primer name | Type    | Position <sup>1</sup> | Region <sup>2</sup> | Sequence (5'-3') <sup>3</sup> |
|-------------|---------|-----------------------|---------------------|-------------------------------|
| NLP1168M    | Reverse | 563-584               | P1                  | TYCACCACCTTGCRGTGGCTGCT       |
| NLP190M     | Reverse | 606-628               | P1                  | CCTTACTGACTTTCCGTGACCTC       |
| NLP1332P    | Forward | 914-935               | P1                  | AAATCACTCAYGGRTGGAGTGG        |
| NLHC77M     | Reverse | 1156-1177             | HC-Pro              | CATCAAGGTTTGTCTCACACAC        |
| NLHC161M    | Reverse | 1142-1163             | HC-Pro              | TCACAYACGTGTCTCGATCAT         |
| NLHC163P    | Forward | 1624-1645             | HC-Pro              | AGGAACAAGATYTCGCAGAAAAG       |
| NLHC177M    | Reverse | 1792-1812             | HC-Pro              | RCCRTTTGGGTTTGGACGCAC         |
| NLHC71M     | Reverse | 1797-1818             | HC-Pro              | CCGTGAACCGTTTGGGTTTGGA        |
| NLHC333P    | Forward | 2293-2314             | HC-Pro              | CCAAGAATGTTCTGTAGATCATG       |
| NLHC63M     | Reverse | 2445-2467             | HC-Pro/P3           | CCAATGGATCGCCTCCAACCTAGA      |
| NLP3334P    | Forward | 2749-2770             | P3                  | GCACAACTGAGAATTTTGAAC         |
| NLP3160M    | Reverse | 3065-3086             | P3                  | CTGCCTCTTAAATCTGCTGTGC        |
| NLP355M     | Reverse | 3070-3092             | P3                  | CTGTATCTGCCTTTCAAATCGGC       |
| NLP3210P    | Forward | 3394-3415             | P3                  | TACAAGATGTACATGATGGAGC        |
| NLP3169P    | Forward | 3435-3456             | P3                  | GGAAGGCTTYTTAGCCTACATT        |
| NLP345P     | Forward | 3494-3516             | P3                  | CAGACGAAGAGGTTGAGACCAA        |
| NLCI52M     | Reverse | 3739-3760             | CI                  | GTGCCTGAGTTTGACTTTTCATC       |
| NLCI211M    | Reverse | 3739-3760             | CI                  | GTGCTGGGTHTGACTTTTCATC        |
| NLCI51P     | Forward | 4121-4142             | CI                  | TGACAACAGGCTTCGCATTACA        |
| NLCI274P    | Forward | 4552-4573             | CI                  | AATGGMACTCCRAACAAGAAAC        |
| NLCI143M    | Reverse | 4672-4695             | CI                  | GTTRTARCACATCATTCTGTTGTC      |
| NLCI170M    | Reverse | 4787-4808             | CI                  | GGAACCTCGCTCAAACCTTTCT        |
| NLCI220M    | Reverse | 4787-4808             | CI                  | GGAACCTCGCTTAGGCCTTTCT        |
| NLCI91P     | Forward | 5182-5203             | CI                  | CACACAGAAGTTTGGGAAACGA        |
| NLCI47M     | Reverse | 5350-5372             | CI                  | GTCCTGTCTTGAAGTACTCCTG        |
| NLCI156M    | Reverse | 5467-5488             | CI                  | CCTTTGCAGCTTCCAAGACACC        |
| POTYCI17P   | Forward | 5902-5924             | VPg                 | GGGAAAGTTAGAGGAATGGGAGC       |
| NLCI135M    | Reverse | 6070-6090             | VPg                 | TWGCCCCAATYTTCTCCTCTCG        |
| NLNIA60M    | Reverse | 6197-6219             | VPg                 | TTTCTTGTGCGATGATCGCAGTG       |
| NLNIA134P   | Forward | 6434-6454             | Nla-Pro             | AYGGMGTTGGATTTGGTCCAC         |
| NLNIA78P    | Forward | 6571-6593             | Nla-Pro             | GATCGGGATCTCATTCTTGTGAC       |
| NLNIA162P   | Forward | 6586-6607             | Nla-Pro             | CTTGTCAGATTACCAAAGGACG        |
| NLNIB164P   | Forward | 7064-7085             | Nla-Pro/Nlb         | AAATGTCACGAGGAGGTTGGAT        |
| NLNIB136P   | Forward | 7082-7102             | Nlb                 | GGATGCGTGATCAAAATACATG        |
| NLNIB110P   | Forward | 8014-8035             | Nlb                 | GTCGATAACACRCTAATGGTCA        |
| POTYNIB21P  | Forward | 8090-8111             | Nlb                 | AYGRAATGTGYCGATTYCTTGT        |
| POTYNIB11P  | Forward | 8240-8261             | Nlb                 | TRTGTTTCATGTCRCAYAAGGG        |
| POTYNIB10M  | Reverse | 8242-8262             | Nlb                 | YACCCTTRTGYGACATGACCA         |
| POTYNIB6P   | Forward | 8299-8320             | Nlb                 | CCTGAACGGGTTGTGTCAATTC        |
| POTYNIB8M   | Reverse | 8398-8422             | Nlb                 | TCCGTATTTACGCGTTAGCTCATC      |
| NLCP257P    | Forward | 8768-8789             | CP                  | TGCCACGACTGAARATGATAAC        |
| NLCP93P     | Forward | 8842-8865             | CP                  | CATCTHATYACATAYACACCACGA      |
| POTYCP1P    | Forward | 8860-8884             | CP                  | CCACGACAAGTGGATTTGTGCAATA     |
| POTYCP18P   | Forward | 8879-8900             | CP                  | CSAACACAAGRGCMAACAAAAG        |
| POTYCP23P   | Forward | 8961-8981             | CP                  | RGCAATYYTRGAAGATTTTGA         |
| NLCP94P     | Forward | 9077-9099             | CP                  | CARTCATYGAACAYGCCAAACCA       |
| POTYCP20P   | Forward | 9193-9215             | CP                  | CTKCAGCGWAAYTTAACCGACAT       |

<sup>1</sup> Correspond to the position in the genome of Zhangzhou isolate [26].

<sup>2</sup> P1; first protein, HC-Pro; helper-component protease protein, P3; third protein, 6K1; 6K first protein, CI; cylindrical inclusion protein, VPg; genome-linked viral protein, Nla-Pro; nuclear inclusion a protein-proteinase protein, Nlb; nuclear inclusion b protein, CP; coat protein.

<sup>3</sup> R; G+A, Y; C+T, S; G+C, M; A+C, W; A+T, K, T+G, V; A+C+G, D; A+T+G, H; A+T+C, N; A+T+G+C

**D. Narcissus degeneration virus and potyvirus specific primers used for sequencing.**

| Primer name | Type    | Position <sup>1</sup> | Region <sup>2</sup> | Sequence (5'-3') <sup>3</sup> |
|-------------|---------|-----------------------|---------------------|-------------------------------|
| NDP150P     | Forward | 132-154               | P1                  | AAAGCTGGGTTCAGTCTGAACA        |
| NDP1293P    | Forward | 249-270               | P1                  | TGTGGGAACCAATATAGGTCCC        |
| NDP192M     | Reverse | 375-396               | P1                  | TCCGAGCATATTCCTTTTCCAG        |
| NDP1116M    | Reverse | 451-474               | P1                  | TTCCACAGCCACCCATGTTGTTG       |
| NDP165P     | Forward | 786-807               | P1                  | GATCGCATAAAAGGAACGAACA        |
| NDHC72P     | Forward | 1371-1393             | HC-Pro              | GATTGCATTCGAGACGTGCCAGT       |
| NDP1309M    | Reverse | 1815-1836             | HC-Pro              | ATGTTTGCAAAGAGCCTGTTCG        |
| NDHC294P    | Forward | 1920-1941             | HC-Pro              | TGGGGAGACAGAGGTTACCATG        |
| NDHC80P     | Forward | 2010-2032             | HC-Pro              | CGGAAGCATGTTAGAGGGAAGAG       |
| NDNDP349P   | Forward | 2810-2832             | P3                  | TTGTTTYAAGGAATTGATGGGGG       |
| NDP381M     | Reverse | 3009-3031             | P3                  | GTCATGTTTTGCGCCAGACACTT       |
| NDP382P     | Forward | 3453-3475             | P3                  | GCTGGTGGYGAACCTATAACTAG       |
| NDP3295P    | Forward | 3555-3576             | P3                  | GTTCTTAACCTGCTTGTACTGC        |
| NDP3296M    | Reverse | 3771-3792             | P3                  | CCGCATAGTATCTCAAATTTGG        |
| NDCI83P     | Forward | 4087-4108             | CI                  | ACTGGCGTATGCAAATGAACAC        |
| NDCI106P    | Forward | 4596-4620             | CI                  | CCAGGGAGAGAGACGGAATATCAT      |
| NDCI117P    | Forward | 5152-5175             | CI                  | CATACGGTTTGCCAATAATGCCGC      |
| NDCI128P    | Forward | 5200-5221             | CI                  | CAAAGTGCACAAGTCAGCAAGC        |
| NDCI84P     | Forward | 5364-5386             | CI                  | CTACCAAATGCAAGCGTTGGAAG       |
| ND6K2103P   | Forward | 5935-5956             | 6K2                 | TTTCCAAGGCATTGCATGATGG        |
| NDVPG102M   | Reverse | 6168-6190             | VPg                 | CTCTTGCCAGCCTTACCTTTTGA       |
| NDVPG107P   | Forward | 6490-6513             | VPg                 | AGATTGGGTTTCCAGCTCATGCAG      |
| NDNIA85P    | Forward | 6624-6646             | Nla-Pro             | CGTAACTATAGTCCGATAGCTCG       |
| NDNIA118P   | Forward | 7055-7077             | Nla-Pro             | GTTACCTGTAGTGAGACCAAGG        |
| NDNIA86P    | Forward | 7273-7294             | Nla-Pro             | TTCGTACGCTTAAGGAAGTGTC        |
| NDNIB87P    | Forward | 7881-7903             | Nlb                 | AACAAGACGCGATCCTTCACAGC       |
| NDNIB67P    | Forward | 8292-8313             | Nlb                 | CTTATGGTGATGTTGGCGATGC        |
| NDNIB108M   | Reverse | 8471-8494             | Nlb                 | TCCGTCACCCTATTTCCAAAATCG      |
| NDNIB1P     | Forward | 8596-8617             | Nlb                 | ATAGGAGCGTGGAACCAGTTAG        |
| NDSYNIB4P   | Forward | 8644-8666             | Nlb                 | TGGTDGARKCGTGGGGMTAYGAT       |
| NDNIB2M     | Reverse | 8746-8770             | Nlb                 | GCTGTATCTGCTAGATAAGGAGCCT     |
| NDCP1P      | Forward | 9142-9166             | CP                  | GGTACGAGAGAGTCATGCAAGCATA     |

<sup>1</sup> Correspond to the position in the genome of Zhangzhou isolate [24].

<sup>2</sup> P1; protein 1, HC-Pro; helper component-proteinase protein, P3; protein 3, CI; cylindrical inclusion protein, 6K2; 6Kda 2 protein, VPg; genome-linked viral protein, Nla-Pro; nuclear inclusion a-proteinase protein, Nlb; nuclear inclusion b protein, CP; coat protein.

<sup>3</sup> R; G+A, Y; C+T, S; G+C, M; A+C, W; A+T, K, T+G, V; A+C+G, D; A+T+G, H; A+T+C, N; A+T+G+C  
GCGGCCGC; NotI restriction site

**E. Primers used for RT-PCR amplification and sequencing carlaviruses.**

| Primer      | Type    | Position <sup>1</sup> | Region <sup>2</sup> | Sequence (5'-3') <sup>3</sup>           | Virus <sup>4</sup> |
|-------------|---------|-----------------------|---------------------|-----------------------------------------|--------------------|
| CARNCLVCP1P | Forward | 7502-7523             | CP                  | CTGACCCAGCAATCCTTACAA                   | NCLV               |
| CARNLVCP2P  | Forward | 7304-7325             | CP                  | ARAARGGKTGGAGRCCTTCYTC                  | NeLV               |
| CARNACP3P   | Forward | 7433-7454             | CP                  | ATTGTGCAARTGCTGGTYCTTC                  | NCLV, NeLV         |
| CARNCLVCP4P | Forward | 7502-7523             | CP                  | <u>GCGGCCGC</u> CTGACCCAGCAATCCTTACAA   | NCLV               |
| CARNLVCP5P  | Forward | 7304-7325             | CP                  | <u>GCGGCCGC</u> ARAARGGKTGGAGRCCTTCYTC  | NeLV               |
| TU3T9M      | Reverse | Poly A                | Poly A              | GGGGCGGCCGCTTTTTTTTTTTTTTTTTTTTTTTTTTTT | NCLV, NeLV         |

<sup>1</sup> Correspond to the position in the genomes of narcissus common latent virus Zhangzhou isolate [74] and nerine latent virus isolate Marijiniup4 [27]

<sup>2</sup> CP; coat protein, Poly A; Poly (A) tail.

<sup>3</sup> R; G+A, Y; C+T, S; G+C, M; A+C, W; A+T, K, T+G, V; A+C+G, D; A+T+G, H; A+T+C, N; A+T+G+C  
GCGGCCGC; NotI restriction site

<sup>4</sup> NCLV: narcissus common latent virus, NeLV: nerine latent virus

**Table S3. Location of narcissus late season yellows virus and narcissus degeneration virus Japanese isolates.**

| Isolate                                            | Prefecture | Location (Town or City)            | Latitude | Longitude | Accession number |
|----------------------------------------------------|------------|------------------------------------|----------|-----------|------------------|
| <b>Narcissus late season yellows virus (NLSYV)</b> |            |                                    |          |           |                  |
| NY-HO42                                            | Hokkaido   | Nango, Shiroishi-ku, Sapporo       | 43.0381  | 141.4124  | LC664195         |
| NY-A65                                             | Aomori     | Nanbu-cho, Sannohe-gun             | 40.4179  | 141.1924  | LC664185         |
| NY-FK266                                           | Fukushima  | Motomiya, Fukushima                | 37.4922  | 140.3401  | LC664192         |
| NY-CB1                                             | Chiba      | Tokoshiro, Kimitsu                 | 35.2645  | 139.7205  | LC664187         |
| NY-CB3                                             | Chiba      | Sotominowa, Kimitsu                | 35.3168  | 139.9159  | LC664188         |
| NY-CB4                                             | Chiba      | Ezuki, Kyonan-machi, Awa-gun       | 35.1322  | 139.8563  | LC664189         |
| NY-GM252                                           | Gunma      | Fujiki, Tomioka                    | 36.2933  | 138.9183  | LC664193         |
| NY-AC230                                           | Aichi      | Sannomaru, Naka-ku, Nagoya         | 35.1820  | 136.8972  | LC664186         |
| NY-FI29                                            | Fukui      | Nashigadaira, Echizen-cho, Nyu-gun | 35.9823  | 135.9588  | LC664182         |
| NY-FI30                                            | Fukui      | Nashigadaira, Echizen-cho, Nyu-gun | 35.9823  | 135.9588  | LC664183         |
| NY-NI263                                           | Niigata    | Kuraoka, Konan-ku, Niigata         | 37.8855  | 139.1505  | LC664200         |
| NY-HG25                                            | Hyogo      | Akurakita, Takarazuka              | 34.8071  | 135.3670  | LC664194         |
| NY-OS1                                             | Osaka      | Minowa, Toyonaka                   | 34.7859  | 135.4486  | LC664203         |
| NY-HR39                                            | Hiroshima  | Sunami, Mihara                     | 34.3676  | 133.0747  | LC664196         |
| NY-SM69A                                           | Shimane    | Unknown                            | 35.1751  | 131.9737  | LC664204         |
| NY-YM2                                             | Yamaguchi  | Chinto, Hagi                       | 34.4139  | 131.4059  | LC664205         |
| NY-KW4                                             | Kagawa     | Ikushima-cho, Takamatsu            | 34.3607  | 133.9515  | LC664198         |
| NY-M4                                              | Miyazaki   | Takaharu-cho, Nishimorokata-gun    | 31.9284  | 130.9378  | LC664184         |
| NY-F1                                              | Fukuoka    | Okawa                              | 33.2078  | 130.3465  | LC664190         |
| NY-F8                                              | Fukuoka    | Kawabaru, Itoshima                 | 33.5138  | 130.2656  | LC664191         |
| NY-KM9                                             | Kumamoto   | Ozu-machi, Kikuchi-gun             | 32.8556  | 130.8676  | LC664197         |
| NY-N15                                             | Nagasaki   | Uki-machi, Isahaya                 | 32.7940  | 130.0778  | LC664199         |
| NY-OI4                                             | Oita       | Tanoyu-machi, Beppu                | 33.2783  | 131.4966  | LC664201         |
| NY-OI12                                            | Oita       | Fujimi-cho, Beppu                  | 33.2866  | 131.4976  | LC664202         |
| NY-KG6                                             | Kagoshima  | Tenokuchi-cho, Kagoshima           | 31.5746  | 130.5283  | LC664206         |
| <b>Narcissus degeneration virus (NDV)</b>          |            |                                    |          |           |                  |
| NY-FK266                                           | Fukushima  | Motomiya                           | 37.5084  | 140.4101  | LC664181         |
| NY-AC230                                           | Aichi      | Sannomaru, Naka-ku, Nagoya         | 35.1878  | 136.9032  | LC664179         |
| NY-FI30                                            | Fukui      | Nashigadaira, Echizen-cho, Nyu-gun | 35.9802  | 135.9624  | LC664180         |
| NY-ME229                                           | Mie        | Komei-cho, Tsu                     | 34.7317  | 136.5063  | LC664178         |
| NY-KG11                                            | Kagoshima  | Uearata-cho, Kagoshima             | 31.5731  | 130.5421  | LC664177         |

**Table S4. Tentative and clear recombination sites in narcissus late season yellows virus genomes.**

| Isolate     | Position (nt) <sup>1</sup> | Region <sup>2</sup> | Parental isolate         |                         | Recombination detection program <sup>3</sup> | <i>P</i> -value <sup>4</sup> |
|-------------|----------------------------|---------------------|--------------------------|-------------------------|----------------------------------------------|------------------------------|
|             |                            |                     | Major                    | Minor                   |                                              |                              |
| NY-CB1      | 9015                       | CP                  | Zhangzhou (Group 5) (5') | NY-N15 (Group 1) (3')   | RG <u><b>B</b></u> MCS <sub>R</sub>          | $6.01 \times 10^{-33}$       |
| NY-F1       | 2044                       | HC-Pro              | NY-FI30 (Group 2) (3')   | NY-GM252 (Group 4) (5') | <u><b>R</b></u> BMCS <sub>R</sub>            | $1.44 \times 10^{-30}$       |
| NY-FK266    | 2044                       | HC-Pro              | NY-FI30 (Group 2) (3')   | NY-GM252 (Group 4) (5') | <u><b>R</b></u> BMCS <sub>R</sub>            | $5.25 \times 10^{-30}$       |
| NY-HG25     | 2044                       | HC-Pro              | NY-FI30 (Group 2) (3')   | NY-GM252 (Group 4) (5') | RG <u><b>B</b></u> MCS <sub>R</sub>          | $8.19 \times 10^{-30}$       |
| NY-HR39     | 2044                       | HC-Pro              | NY-FI30 (Group 2) (3')   | NY-GM252 (Group 4) (5') | <u><b>R</b></u> BMCS <sub>R</sub>            | $2.15 \times 10^{-28}$       |
| NY-OS1      | 2044                       | HC-Pro              | NY-FI30 (Group 2) (3')   | NY-GM252 (Group 4) (5') | <u><b>R</b></u> GBMCS <sub>R</sub>           | $8.01 \times 10^{-30}$       |
| Marijiniup9 | 2044                       | HC-Pro              | NY-FI30 (Group 2) (3')   | NY-GM252 (Group 4) (5') | <u><b>R</b></u> GBMCS <sub>R</sub>           | $1.95 \times 10^{-34}$       |
| (JX156421)  | 7473                       | NIb                 | NY-OS1 (Group 2) (5')    | NY-FI30 (Group 2) (3')  | <u><b>R</b></u> BMCS <sub>R</sub>            | $2.71 \times 10^{-9}$        |
|             | 9066                       | CP                  | NY-OS1 (Group 2) (5')    | NY-FI30 (Group 2) (3')  | <u><b>R</b></u> BMCS <sub>R</sub>            | $5.10 \times 10^{-14}$       |

<sup>1</sup> Recombination sites detected in the NLSYV genomes by the recombination detection programs, from the aligned sequences of the likely recombinant and its 'parental isolate'. Correspond to the position in the genome of Zhangzhou isolate [26] (accession number JQ326210).

<sup>2</sup> HC-Pro; helper component-proteinase protein, NIb; nuclear inclusion b protein, CP; coat protein.

<sup>3</sup> Recombinant isolates identified by the recombination detection programs: R (RDP), G (GENECONV), B (BOOTSCAN), M (MAXCHI), C (CHIMAERA) and S<sub>R</sub> (SISCAN) programs in RDP4. The analyses were done using default settings and a Bonferroni-corrected *P*-value cut-off of 0.01 in RDP4.

<sup>4</sup> The reported *P*-value is for the program in bold type and underlined in RDP4 and is the smallest *P*-value among the isolates calculated for the region in question. *P*-values smaller than  $1.0 \times 10^{-4}$  are listed.
